# Supplementary material for: Metallomics approach for the identification of the iron transport protein transferrin in the blood of harbour seals (Phoca vitulina)
Source: Royal Society of Chemistry journal article supplement (doi:10.1039/c0mt00009d), 2010-01-01
Supplement: c0mt00009d.pdf [file c0mt00009d.pdf]

**Supplementary material** (Manuscript ID: MT-ART-04-2010-000009)

**Metallomics approach for the identification of the iron transport protein transferrin in the blood of harbour seals (*Phoca vitulina*)**

Mechthild Grebe, Daniel Pröfrock, Antje Kakuschke, Jose A.C. Broekaert and  
Andreas Prange

**Table S-1: Compilation of the average retention times and peak area RSDs (n=3) obtained during the repetitive, highly resolved separation of seal Tf isoforms using anion exchange HPLC-ICP-MS.**

| <b>Peak No.</b> | <b>Average Retention time (min)</b> | <b>Retention time RSD [%]</b> | <b>Peak area RSD [%]</b> |
|-----------------|-------------------------------------|-------------------------------|--------------------------|
| <b>1</b>        | 4.97                                | 0.9                           | 8.8                      |
| <b>2</b>        | 7.11                                | 1.4                           | 9.3                      |
| <b>3</b>        | 10.6                                | 0.9                           | 6.1                      |
| <b>4</b>        | 12.9                                | 0.3                           | 2.4                      |
| <b>5</b>        | 14.6                                | 0.2                           | 8.6                      |
| <b>6</b>        | 16.5                                | 0.3                           | 2.8                      |
| <b>7</b>        | 18.6                                | 0.3                           | 4.6                      |
| <b>8</b>        | 20.0                                | 0.2                           | 3.5                      |

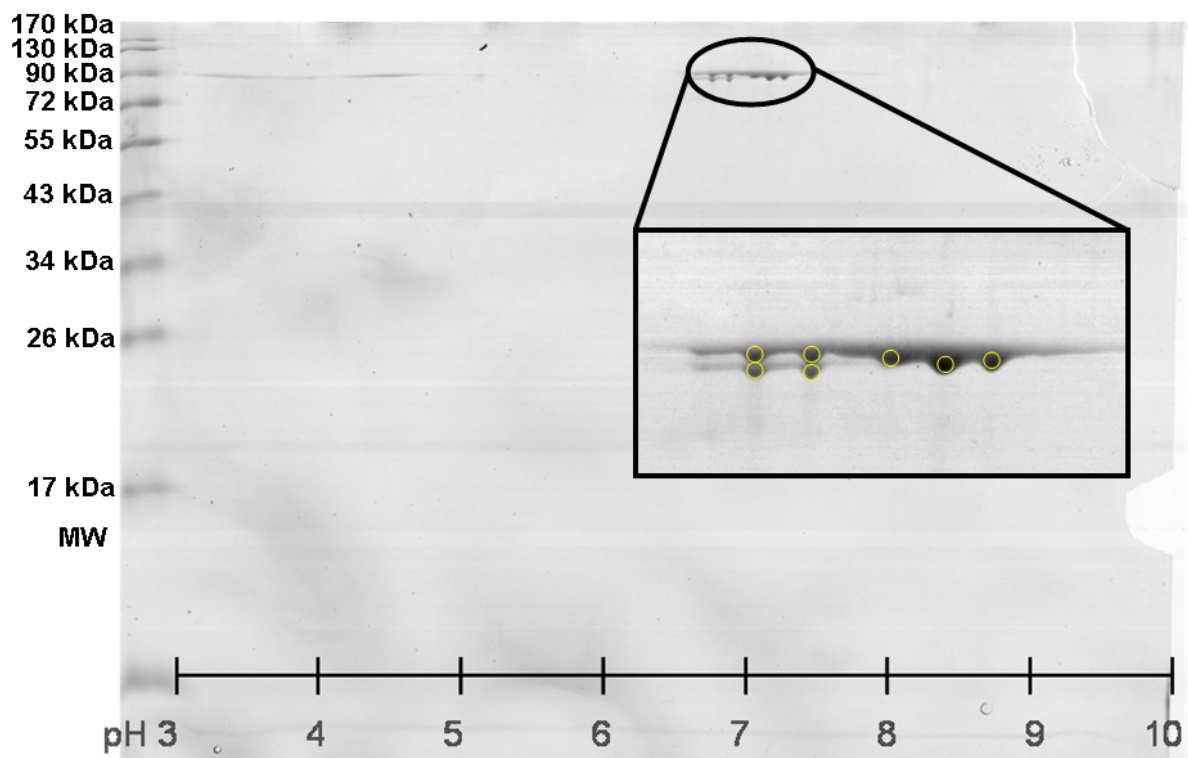

Figure S-1

**Figure S-1**

2D gel electrophoretic separation of the combined collected iron containing protein species derived after the anion exchange HPLC-ICP-MS analysis and fractionation of a depleted seal plasma sample.

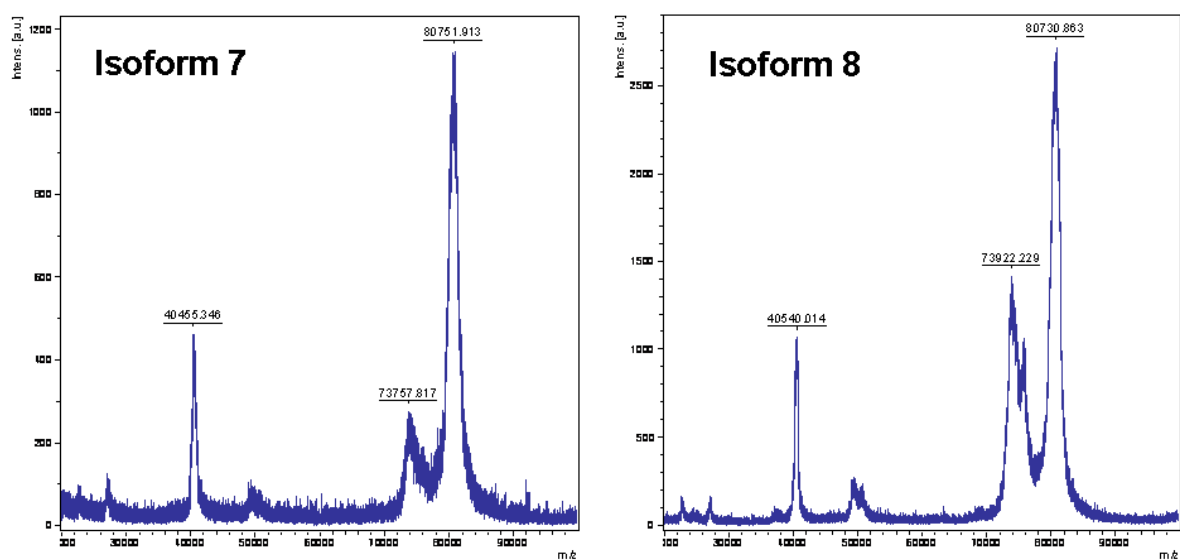

Figure S-2

**Figure S-2**

Annotated MALDI-TOF spectra of the further iron containing protein species (peak 7 and 8) obtained by element guided fractionation using anion exchange HPLC-ICP-MS.

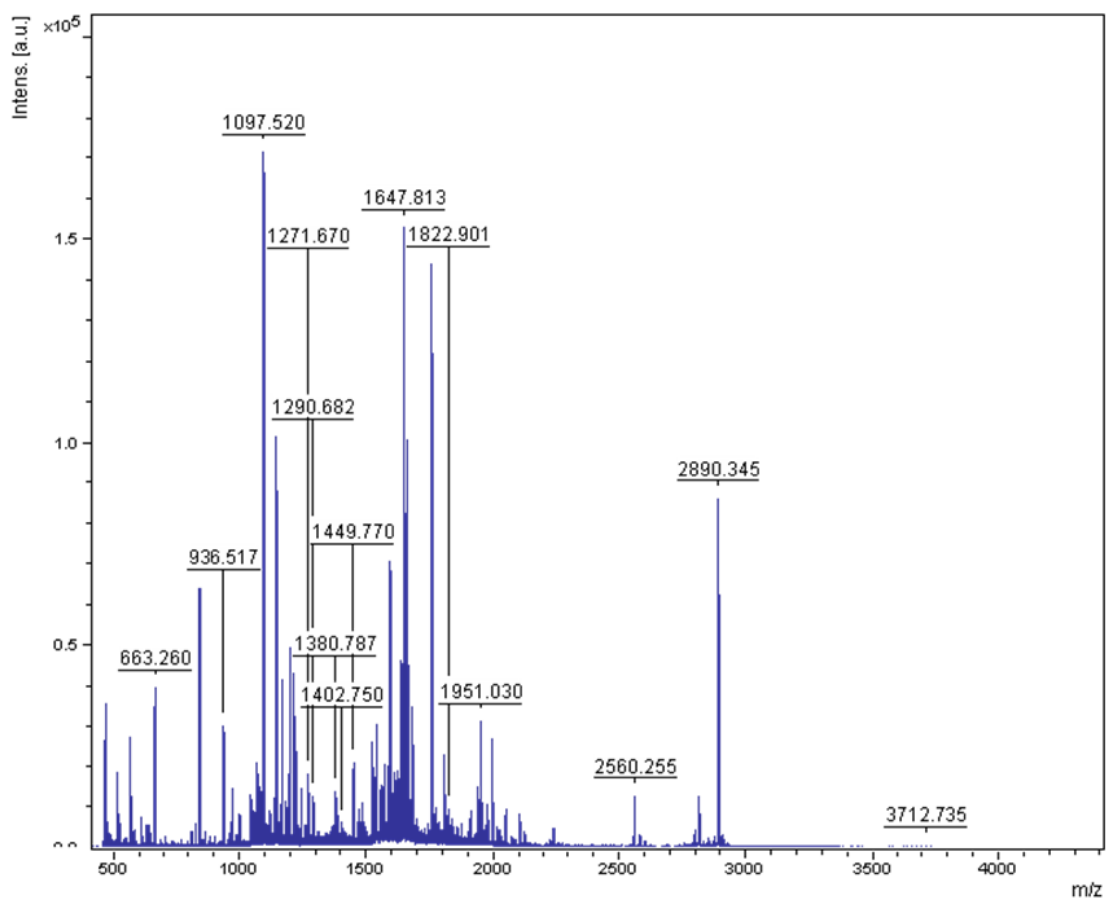

**Figure S-3**

**Figure S-3**

MALDI-TOF peptide mass fingerprint spectra of spot 5 (see Figure S-1) after digestion with PNGaseF and Trypsin, respectively, used for cross species protein identification.

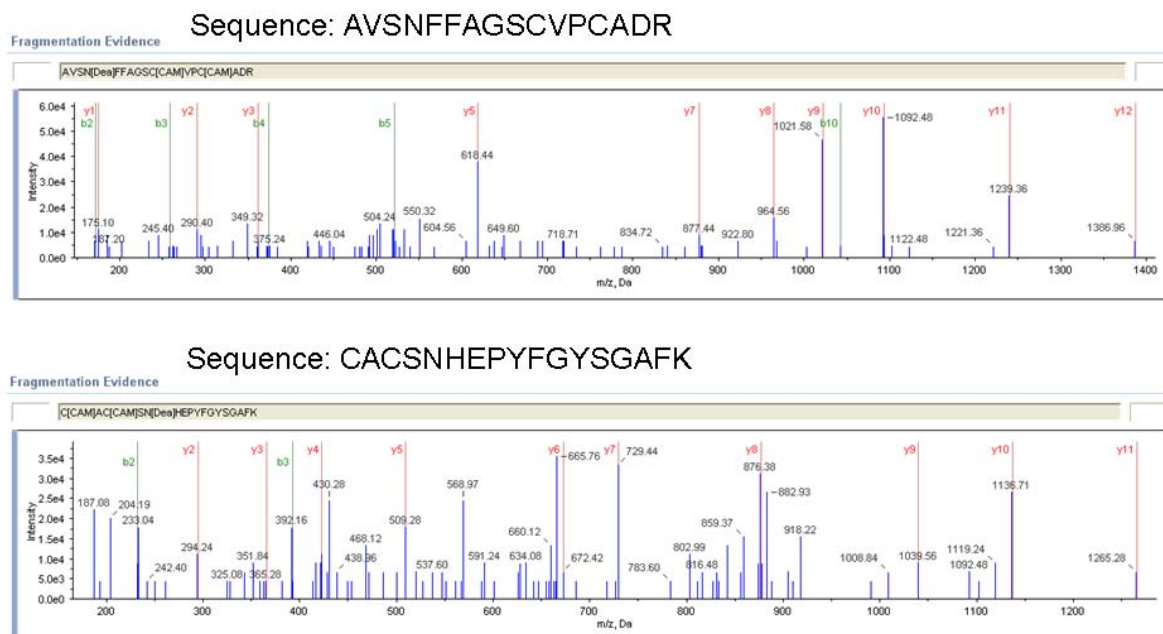

Figure S-4

### Figure S-4

NanoLC-ESI-MS-MS analysis allowed the sequence identification and verification of the two peptides with the sequences AVSNFFAGSCVPCADR and CACSNHEPYFGYSGAFK, respectively, which were also observed during PMF experiments.
